# Supplementary material
Source: publisher figshare collection journal article supplement (https://aacr.figshare.com/articles/dataset/_/23668561)
Supplement: Supplementary file 1 [file 41536744]

**Supplementary Table S1. DNA Oligos**

| <b>cDNA analysis</b> | <b>Forward primer</b>                                        | <b>Reverse primer</b>                                       |
|----------------------|--------------------------------------------------------------|-------------------------------------------------------------|
| Mouse 18s rRNA       | AGGGGAGAGCGGGTAAGAGA                                         | GGACAGGACTAGGCGGAACA                                        |
| Human 18s rRNA       | CATTCGAACGTCTGCCCTAT                                         | CCTCCAATGGATCCTCGTTA                                        |
| <i>Cat</i>           | GGTTTGGCCTCACAAAGGACTACC                                     | CGGTAGGGACAGTTCACAGGTAT                                     |
| <i>Gclc</i>          | TGCCAACGAGTCTGACCAT                                          | ACCTTGGACAGCGGAATGA                                         |
| <i>Nqo1</i>          | ATCCTGGAAGGATGGAAGAAAC                                       | TCTAGCTTTGATCTGGTTGTCAG                                     |
| <i>Gclm</i>          | AGACACAGTTGGAGCAGCT                                          | AGTACCTCAGCAGCCACAG                                         |
| <i>Txnrd1</i>        | TCTCCTTGCCTTACTGCC                                           | TCGCCCTCTATGGTCTCCT                                         |
| <i>Glut2</i>         | GGGGACAACTTGGGAAGGA                                          | GGGCCAGTTGGTGAAGAGT                                         |
| <i>Gck</i>           | GGAGCGTGAAGACGAAACA                                          | AGCCCTTGGTCCAGTTGAG                                         |
| <i>GCK</i>           | AACTTCAGGGTGATGCTGGT                                         | AGCCCTTGGTCCAGTTGAG<br>(Same as that for mouse <i>Gck</i> ) |
| <i>Gpi1</i>          | GTGTGGACCACCAGACAGG                                          | CAGGCAACTTCCCCTTCAT                                         |
| <i>GPI1</i>          | GTGTGGACCACCAGACAGG<br>(Same as that for mouse <i>Gpi1</i> ) | TCCTTTCGGGCCTCCTCCG                                         |
| <i>Aldoa</i>         | AGCAGAATGGCATTGTACC                                          | GGCAATCTCCTCATTGGAA                                         |
| <i>ALDOA</i>         | TTGGGGGTGTCATCCTCTTC                                         | GGCATTTCATGATGGCGA                                          |
| <i>Pgk</i>           | ATGCTTTCCGAGCCTCACT                                          | ACTTTAGCGCCTCCCAAGA                                         |
| <i>PGK</i>           | CCAACCCAGCTGCTGGGTCT                                         | CCACCAGCCTTCTGTGGCAG                                        |
| <i>Eno1</i>          | GGCTGCCTCCGAGTTCTAC                                          | CAATCCGCTTAGGGTTGGT                                         |
| <i>ENO1</i>          | GATCGAGATGGATGGAACAG                                         | CTGGGAGGATCATGAACTCC                                        |
| <i>Pklr</i>          | GGAGGCTTCCTTCAAGTGC                                          | ATCTGCCAGACAGCCTCT                                          |
| <i>Pdha1</i>         | CGAGCAATTCTTGCAGAGC                                          | GCACCATCGCCGTATAATG                                         |
| <i>PDHA1</i>         | TCGCAGAGCTTACAGGACGA                                         | ATTTCCACAAAGCTGCCATG                                        |
| <i>Pygl</i>          | CAGCTTGGATTGGACATGG                                          | CTTCTCCAAGGGTTTCCA                                          |
| <i>Gbe1</i>          | GGCATTGGTTGGTGACAAG                                          | CCTTTCCTTGGGAAGTCCA                                         |
| <i>Cd36</i>          | GGCCAAGCTATTGCGACAT                                          | GGATTCTGGAGGGGTGATG                                         |
| <i>Fasn</i>          | TGGACAGCTTCCGTGAGTC                                          | CAAGGAGTGCCCAATGATG                                         |
| <i>Hadh</i>          | CCGATGACCAGCCAGAAGA                                          | GGGGTTCTCTGGCTCCATT                                         |
| <i>Acly</i>          | AGGGCATTGTGAGAGCGAT                                          | GGAAGTTGGCAGTGTGAGC                                         |
| <i>Cs</i>            | TTACCTGTCTTTGCAGCAGCCA                                       | CAGAGCAAACCTCTCGCTGACAGG                                    |
| <i>ldh1</i>          | AAGGAGATGAAATGACACGAATC                                      | TTCCACATTTGTTTCAACTTGAA                                     |
| <i>Ogdh</i>          | ATGTTTCATTTAAGGACTTGTGC                                      | AATGTCCCATGACTTATGTACAC                                     |
| <i>Did</i>           | ATGCAGAGCTGGAGTCGTGTGTA                                      | TTTTTCTCAATGCAGACTGTCTT                                     |
| <i>Dlst</i>          | CTTCCAGAAGGGGAAGTCCCTC                                       | CTGACATCTCCCTCTGTGACAGA                                     |
| <i>Sucla2</i>        | GTGGCCTCAAAGGAGGAGTGAAG                                      | AATACAGGACCTTCAAATGACCT                                     |
| <i>Sdha</i>          | CAGGCTTGCAGCTGCATTTGGC                                       | AAATCTTCCCATCTTCAGTTCTG                                     |
| <i>Fh</i>            | AATGGCAAGCCAAAATTCCTTCC                                      | TTTACCTTACGCTACCTCATCTG                                     |
| <i>Mdh1</i>          | ATGTCTGAACCAATCAGAGTCCT                                      | CACATCCAGGTCTTTGAAGGCAA                                     |
| <i>Atf2</i>          | CCTCTTGCAACACCCATCA                                          | GTACTTGAGGTTGGTGAAG                                         |
| <i>Cdyl</i>          | GTACGAGGTGGAAGTATC                                           | TGCTGGCACGAGCCAGGCT                                         |
| <i>CIITA</i>         | GGGCAGCTACCTGGAACCTC                                         | TTCCGCAATGTTGGCATAG                                         |
| <i>Csrp2bp</i>       | GCTGTCTTACTTCTGTGAC                                          | GGAAATAACCTTGACGTCC                                         |
| <i>Esco1</i>         | AGCACCTGCTTTCCACAA                                           | CTTAGTTCTGGAATAGCAC                                         |
| <i>Esco2</i>         | GAGAAATACTACCTCAATC                                          | TGATTTAGACTTGATGTGC                                         |
| <i>Hat1</i>          | TCGGTTACAAGGGCCTGAA                                          | CAAAAGGCTTCAAATTAGT                                         |
| <i>Kat2a</i>         | AGCAGGGGAGAAGAGGAA                                           | TGGAACCTCGATGATTCTC                                         |

|                      |                          |                          |
|----------------------|--------------------------|--------------------------|
| <i>Kat2b</i>         | CCAAACAAGTGTACTTCTA      | GATGCGGTTTCAGAAACATC     |
| <i>Kat5</i>          | CCGTAGGGCAGTGGCAGCC      | AGAAGTACCACGGCTTGAG      |
| <i>Kat8</i>          | CTGGCATTTCAGCAGAAGTG     | CGCTTTTGGTTTTCGAGTGA     |
| <i>Kat7</i>          | CAAGGACATGTCCCTGAAG      | GTGCTCTCACCTTGCATTC      |
| <i>Kat6a</i>         | GAAGTATGAAATCCACACC      | TCACGTTCCCATCAACCTC      |
| <i>Kat6b</i>         | GGCCTTGCTTCATATAAGG      | TAAGATCACTCTGGCTTCT      |
| <i>Ncoa1</i>         | CTACTTGGGTTACAATCAG      | CTTGGTTCTCAGTACCTGG      |
| <i>Ncoa3</i>         | CTTGCAGTGCTGTATGATC      | CTTCTGGGACCATGACTGC      |
| <i>Ncoa6</i>         | ATGGTTTTGGATGACCTTC      | TTGAAGTCTTTATCATCTA      |
| <i>Hdac1</i>         | TACTACGACGGGGATGTTG      | ATTCAGACATATTATCTGG      |
| <i>Hdac2</i>         | CATATGAGACTGCAGTTGC      | ACACCAGGTGCATGTGGTA      |
| <i>Hdac3</i>         | GACACCCAATGAAACCTCA      | GGCATTAAAGGCTCTTGGTG     |
| <i>Hdac4</i>         | GCCATGAAGCACCAGCAGG      | TAGAGCCTTCTTCTTGTGG      |
| <i>Hdac5</i>         | AGCAGCAGCGGCAGGAGGA      | AGCATTGGGGTGCTGTGG       |
| <i>Hdac6</i>         | CGGAGGTAAAGAAGAAAGG      | AGCCGCTCAGGGCTTTCAG      |
| <i>Hdac7</i>         | CCAAGCCAGTGAGAAGCC       | TGCTGCTCCCAGGGTGCGA      |
| <i>Hdac8</i>         | CGGTTTATATTTACAGTCC      | GACTTTCTGGAGATGTTGC      |
| <i>Hdac9</i>         | GTTGAGTAAATCAGCAACA      | GCTCTGAGGCAGTTTTTCT      |
| <i>Hdac10</i>        | GACCCTGGATAAAGAGGAG      | TGTTGAACACACAGAATCC      |
| <i>Hdac11</i>        | GAGGAATGTCAGGAGGTCC      | TAATACGGGCTGTGCGCTT      |
| <i>Sirt1</i>         | GCGGATAGGTCCATATACT      | CTCCTGCAGTAACTTCACA      |
| <i>Sirt2</i>         | AAGGTGGACCTCCTCATCA      | CCACGTCCCTGTAAGCCTT      |
| <i>Sirt3</i>         | GCATCAGCACACCCAGTGG      | CAGAAGCAGCTCCTTGTCG      |
| <i>Sirt4</i>         | CTTCATTAGCCTTTCCAAG      | GCCCAGTGTGCTGGGTTGG      |
| <i>Sirt5</i>         | CCCGGGCACCTGGCCATTG      | CTGGGCAGATCGGACTCCT      |
| <i>Sirt6</i>         | GTCAGAGACACGGTTGTGG      | AGGGGCAGGTTCCCCTG        |
| <i>Sirt7</i>         | CTGGAATCAGCACAGCAGC      | GCAACCCACTCCGCAGGTG      |
| <i>Tbp</i>           | TCCTACTGCAGGATACTAGAAAGG | CTAACAATTTACAAGCTGCGTTTT |
| <i>Actb</i>          | GACGAGGCCAGAGCAAGAGAGG   | TCTCAAACATGATCTGGGTCATC  |
| <b>ChIP analysis</b> | <b>Forward primer</b>    | <b>Reverse primer</b>    |
| <i>Nqo1</i>          | TTTCTAAGAGCAGAACGCAGCAC  | AGACCTCCTGGGTACAAAATGGA  |
| <i>Cat</i>           | GTAGGGAGAGACACGGTTTCCAC  | AGAAAAGACAAATCAAGAACCAG  |
| <i>Gck</i>           | AGGCCCTGACAGGAGACAT      | GCTCTGCTGAGCTGTGAGG      |
| <i>Gpi</i>           | TGTCCTTGATGCCTCCTTG      | CAGCTCTCTCGTGCCTGTC      |
| <i>Aldoa</i>         | CCGTCCTGTGCCAGGTGAG      | GTTTTTCCACCTCATCTTG      |
| <i>Eno1</i>          | AACTAAAATGTCACCACAG      | GCTCTGGCCTGAGAGTCCT      |
| <i>Aco2</i>          | TTCTACATATGTTGCATTCTG    | TCCTCCCAGCAGCCAAGAGTG    |
| <i>Suclg2</i>        | CCCCTGGGGCTGAGATCTGCT    | GAGGGACGGAGCTAGAAAGG     |
| <i>Me1</i>           | GTCTCTCGCTTGGCGTTCACCAG  | GGGCGGGCGTGGGTGGCGAGA    |
| <i>Pdha1</i>         | CGGATCCCAATACAGACGA      | CCACACCCACAGTGACACA      |
| <i>Cd36</i>          | TGGTGATCCATGACTTGTCC     | GGCGTGGTTTTGGTAAGGT      |
| <i>Fasn</i>          | GTTTCGATGTGGAGCAGGC      | GCCCTCATCTCTGTCCTCC      |
| <i>Tbp</i>           | GTGCCAGCATCACTATTTTC     | AGATGGGAATTCCAGGAGTC     |
| <i>Actb</i>          | AAAGTTGCCTTTTATGGCTC     | GTCCCAAGCCCCACGCACC      |
